# Supplementary material for: New Carbamoyl Surface-Modified ZrO2 Nanohybrids for Selective Au Extraction from E-Waste
Source: MDPI journal article supplement (doi:10.3390/molecules28052219), 2023-02-27
Supplement: s1 [file s1]

## Supplementary Materials

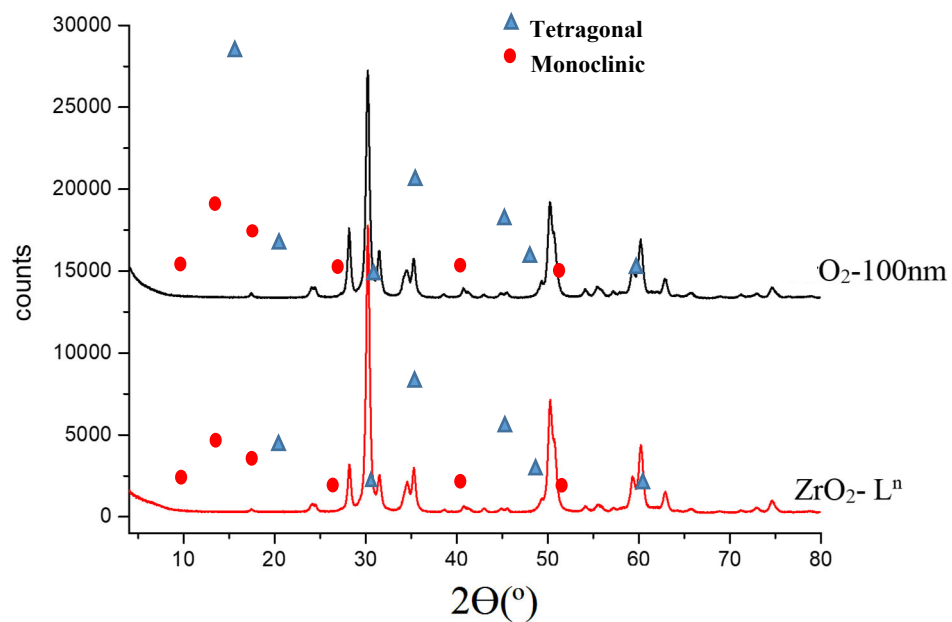

**Figure S1.** – XRD spectra of commercial  $\text{ZrO}_2$  (10 %wt) and modified  $\text{ZrO}_2\text{-L}^n$  nanoparticle.

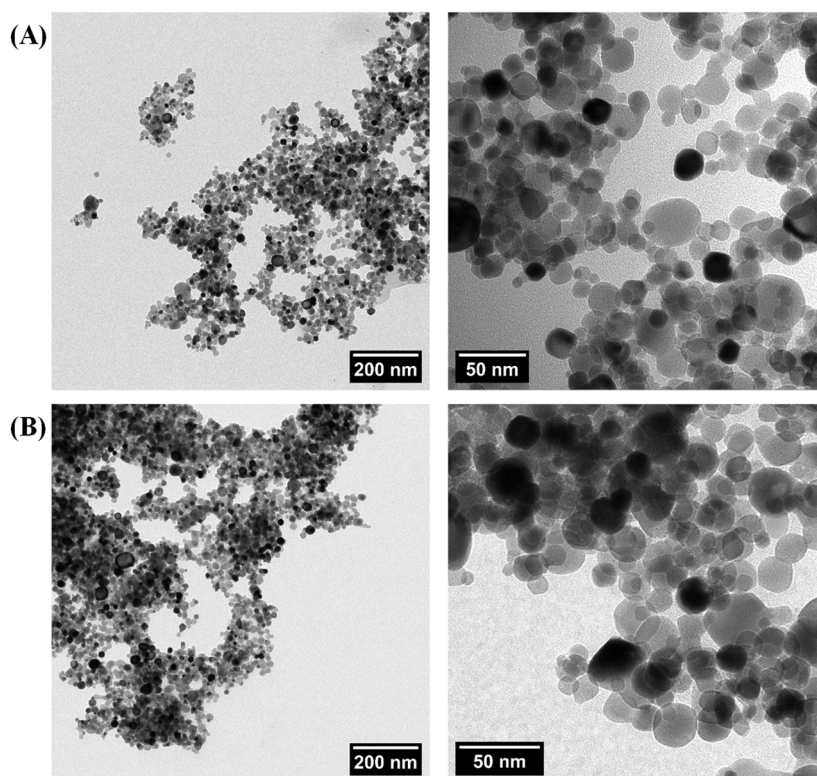

**Figure S2.** – TEM images for (A) commercial  $\text{ZrO}_2$  (10 %wt) and (B) modified  $\text{ZrO}_2\text{-L}^n$  nanoparticles.

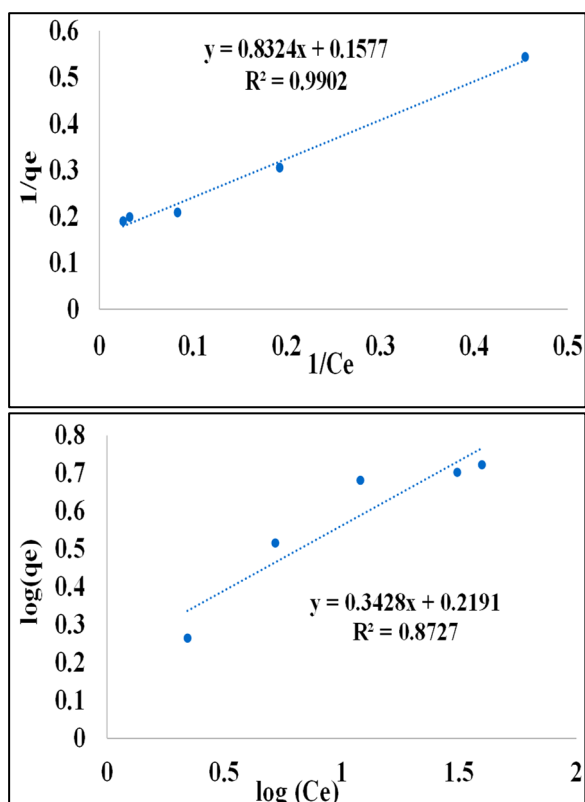

**Figure S3.** – a) Langmuir and b) Freundlich isotherms for Au(III) adsorption on  $ZrO_2-L$ .<sup>6</sup>

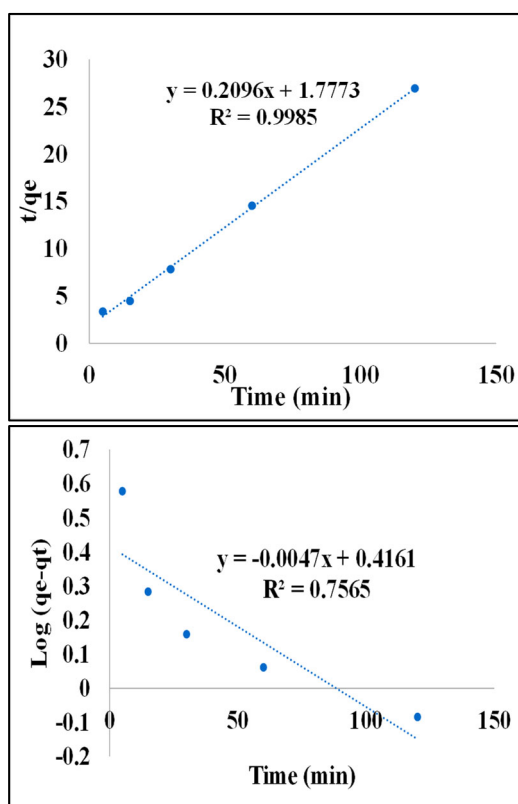

**Figure S4.** – a) Pseudo second order, and b) pseudo first-order models for Au(III) adsorption kinetics.

**Table S1.**  $^{31}\text{P}$  MAS chemical shift of phosphonic ligands ( $\text{L}^n$ ) and modified zirconia nanoparticles ( $\text{ZrO}_2\text{-L}^n$ ).

| Ligands                       | Chemical shift<br>(ppm) | $\text{ZrO}_2\text{-L}^n$ | Chemical shift<br>(ppm) |
|-------------------------------|-------------------------|---------------------------|-------------------------|
| $\text{L}^1 = \text{DECMPA}$  | 15.9                    | $\text{ZrO}_2\text{-L}^1$ | 11.6                    |
| $\text{L}^2 = \text{DPCMPA}$  | 15.2                    | $\text{ZrO}_2\text{-L}^2$ | 11.9                    |
| $\text{L}^3 = \text{DOCMPA}$  | 18.3                    | $\text{ZrO}_2\text{-L}^3$ | 11.0                    |
| $\text{L}^4 = \text{DEHCMPA}$ | 19.2                    | $\text{ZrO}_2\text{-L}^4$ | 11.8                    |
| $\text{L}^5 = \text{DBCBA}$   | 29.2                    | $\text{ZrO}_2\text{-L}^5$ | 29.3 ; 22.2             |
| $\text{L}^6 = \text{DBCBA}$   | 29.7                    | $\text{ZrO}_2\text{-L}^6$ | 29.3 ; 22.8             |
